1 **Non-pharmaceutical interventions to reduce influenza transmission in**  
2 **households: a systematic review and meta-analysis**

3

4 Jessica Y. Wong<sup>1</sup>, Wey Wen Lim<sup>1</sup>, Justin K. Cheung<sup>1</sup>, Caitriona Murphy<sup>1</sup>, Eunice Y.  
5 C. Shiu<sup>1</sup>, Jingyi Xiao<sup>1</sup>, Dongxuan Chen<sup>1,2</sup>, Yanmin Xie<sup>1</sup>, Mingwei Li<sup>1</sup>, Hualei Xin<sup>1</sup>,  
6 Michelle Szeto<sup>1</sup>, Sammi Choi<sup>1</sup>, Benjamin J. Cowling<sup>1,2</sup>

7

8 **Affiliations:**

9 1. World Health Organization Collaborating Centre for Infectious Disease

10 Epidemiology and Control, School of Public Health, Li Ka Shing Faculty of

11 Medicine, The University of Hong Kong, Hong Kong Special Administrative

12 Region, China

13 2. Laboratory of Data Discovery for Health Limited, Hong Kong Science and

14 Technology Park, New Territories, Hong Kong Special Administrative Region,

15 China

16

17 **Corresponding author:**

18 Prof. Benjamin J. Cowling, School of Public Health, Li Ka Shing Faculty of Medicine,

19 The University of Hong Kong, 7 Sassoon Road, Pokfulam, Hong Kong

20 Tel: +852 3917 6711; Email: [bcowling@hku.hk](mailto:bcowling@hku.hk)

21

22 Word count (abstract): 204

23 Word count (main text): 3,021

24

25 **ABSTRACT**

26 **Background:** Influenza pandemic plans often recommend non-pharmaceutical  
27 interventions (NPIs) in household settings, including hand hygiene and face masks.

28 We reviewed the evidence supporting the recommendations of these measures to  
29 prevent the spread of influenza in households.

30 **Methods:** We performed systematic reviews between 26 May and 30 August 2022 in  
31 Medline, PubMed, EMBASE, and CENTRAL to identify evidence for the  
32 effectiveness of selected measures recommended by representative national influenza  
33 pandemic plans. We prioritized evidence from randomized controlled trials. Fixed-  
34 effects models were used to estimate the overall effects. Systematic reviews were  
35 registered in the OSF registry (<https://osf.io/8kyth>).

36 **Results:** We selected 9 NPIs for evidence review. We identified 9 randomized-  
37 controlled trials related to hand hygiene and face masks in household settings. 2  
38 studies reported that measures could delay the introduction of influenza virus  
39 infections into households. However, we did not identify evidence from randomized  
40 controlled trials that indicated a substantial effect of hand hygiene and face masks in  
41 preventing the spread of pandemic influenza within households.

42 **Conclusion:** Limited evidence indicated that within-household measures may likely  
43 be effective only when implemented before or as soon as possible after symptom  
44 onset in an infected case. Improving the evidence base for NPIs in households and  
45 elsewhere is a continuing priority.

46 **Funding:** World Health Organization and the Strategic Topic Grants Scheme

47 **Keywords:** Influenza, Non-pharmaceutical interventions, Households

48

49

50

## 51 **INTRODUCTION**

52 The threat posed by the next influenza A pandemic has not diminished in the wake of  
53 the COVID-19 pandemic. It is important to adapt influenza pandemic plans in light of  
54 experiences from the COVID-19 pandemic. Given the delays in the availability of  
55 specific vaccines and limited stockpiles of influenza antivirals in many locations, non-  
56 pharmaceutical interventions (NPIs) – also referred to as public health and social  
57 measures – will continue to provide the first line of defense in the next influenza  
58 pandemic, just as they did at the start of the COVID-19 pandemic [1].

59

60 Influenza virus infections spread mainly through inhalation of infectious respiratory  
61 particles that can occur during close contact between individuals, and one of the  
62 settings responsible for a considerable fraction of all influenza transmission is  
63 households [2]. In the 2009 influenza A(H1N1)pdm09 pandemic, some studies  
64 estimated that around one-third of all transmission events occurred in households [3].  
65 NPIs in households could, therefore, make a major contribution to containment or  
66 mitigation efforts. We reviewed the scientific evidence supporting NPIs that might be  
67 recommended to reduce influenza transmission in households.

68

## 69 **METHODS**

### 70 **Selection of NPIs**

71 We reviewed the websites of national public health organizations from around the  
72 world to determine which NPIs might be recommended in households during  
73 influenza epidemics or pandemics (Table S1). Two to three countries were selected as  
74 a sample from each continent to capture snapshots of country-specific

75 recommendations for NPIs to mitigate the spread of influenza in households. From  
76 this, we identified a list of NPIs that could be assessed in evidence reviews.

77

### 78 **Search strategy**

79 We then conducted systematic reviews between 26 May and 30 August 2022 to  
80 evaluate the effectiveness of these selected measures on influenza virus transmission  
81 in the household setting. These systematic reviews followed the Preferred Reporting  
82 Items for Systematic Reviews and Meta-Analyses (PRISMA) guidelines. The protocol  
83 was registered in the Open Science Framework (OSF) registry under the registration  
84 number <https://osf.io/8kyth>. Four databases (Medline, PubMed, EMBASE, and  
85 CENTRAL) were searched for literature in all languages with specific search terms  
86 (Table S2).

87

### 88 **Study selection**

89 For each review, two authors screened titles of all papers identified by the search  
90 strategy independently. Abstracts for potentially relevant papers and the full texts of  
91 manuscripts were assessed for eligibility. We aimed to identify studies of the efficacy  
92 of each measure against laboratory-confirmed influenza outcomes in “private”  
93 household settings, and defined a private household (denoted as “household”  
94 hereafter) as two or more individuals living, not necessarily related, under the same  
95 unit with common housekeeping (i.e. providing food for themselves) [4]. We  
96 prioritized evidence from randomized controlled trials (RCTs) as they provide the  
97 highest quality of evidence. For measures with a lack of RCTs with laboratory-  
98 confirmed influenza outcomes, we also searched for observational studies on  
99 laboratory-confirmed influenza, influenza-like illness (ILI), and respiratory illness

100 outcomes (such as acute respiratory illness or ARI). If a published systematic review  
101 was identified through our search, we updated the review using pre-defined search  
102 terms and evaluated literature published after the search date of the previous review.  
103 Because the relative importance of modes of influenza transmission might vary in  
104 different household settings, studies that were conducted in “institutional” households  
105 (such as dormitories for students and homes for the elderly) whose need for shelter  
106 and subsistence is being provided by a common authority were excluded.

107

### 108 **Statistical analysis**

109 Meta-analyses were performed for interventions with a sufficient number of studies.  
110 The efficacy or effectiveness of measures in preventing laboratory-confirmed  
111 influenza was measured by risk ratios (RRs). Overall effects were estimated in pooled  
112 analyses with fixed-effects models. No overall effect was generated if there was  
113 considerable heterogeneity based on an estimated  $I^2$  statistic  $\geq 75\%$ . The Appendix  
114 includes additional details of the search strategies (Tables S1 and S2), selection of  
115 articles (Figures S1-S9), and summaries of the selected articles (Tables S3 and S4).

116

## 117 **RESULTS**

### 118 **National public health guidance on NPIs in households**

119 We reviewed the websites of national public health organizations from 15 countries,  
120 specifically: Ghana, Nigeria and South Africa in Africa; China, Singapore and South  
121 Korea in Asia; Germany, Italy and United Kingdom in Europe; Canada and United  
122 States in North America; Australia and New Zealand in Oceania; and Peru and Brazil  
123 in South America (Table 1). NPIs that were implemented could be broadly  
124 categorized as personal protective measures, environmental measures or other

125 measures which included measures such as hand hygiene, surface disinfection or  
126 physical distancing respectively. For personal protective measures, all selected  
127 countries except Germany recommended hand hygiene and respiratory etiquette in  
128 household settings, while around half of the countries (e.g., China, South Korea and  
129 Italy) recommended the use of face masks. None of the sampled countries  
130 recommended face shields. Similarly, around half of the countries (e.g., South Africa,  
131 China and Germany) recommended surface and object cleaning or ventilation or both  
132 as environmental measures in household settings, and none recommended  
133 humidification. Finally, all countries recommended the isolation of sick individuals  
134 and physical distancing in household settings during influenza epidemics or  
135 pandemics.

136

137 Country-specific recommendations on NPIs during influenza epidemics or pandemics  
138 were generally disseminated through national health agency websites in the form of  
139 general health information or formal guidelines for influenza (Table S1) [5, 6].  
140 Recommendations in four countries were updated after the A(H1N1)pdm09 pandemic  
141 [6-8], while recommendations for the other 11 countries were updated during the  
142 COVID-19 pandemic (Table S1) [9, 10].

143

#### 144 **Systematic review of intervention studies**

145 From the review of national recommendations, we constructed a list of 9 NPIs  
146 including those that have been recommended and some that have not (Table 2). We  
147 identified a total of 23,001 articles for title and abstract screening across the 9 NPIs  
148 and 800 full-text articles were retrieved and reviewed (Figures S1–S9). For hand  
149 hygiene, 576 articles were reviewed, 62 full-text articles were screened, and 7

150 intervention studies were identified for the meta-analysis. For face masks, 1,890  
151 articles were reviewed, 151 full-text articles were screened, and 7 intervention studies  
152 were identified for the meta-analysis. No intervention studies were identified for the  
153 other 7 NPIs. After removing duplicates for studies based on hand hygiene and face  
154 masks, 9 unique intervention studies were included in the review (Tables 2, S3–S4).

155

156 **Personal protective measures: hand hygiene, respiratory etiquette, face masks,**  
157 **and face shields**

158 We identified seven RCTs, six of which were included in the meta-analysis, to assess  
159 the efficacy of hand hygiene against transmission of laboratory-confirmed influenza  
160 in household settings with at least one case, with 5,118 participants (Figure 1; Tables  
161 S3) [11-13]. The study by Levy et al [12] was excluded in the meta-analysis because  
162 the number of secondary influenza virus infections were reported in terms of number  
163 of households instead of number of individuals. An overall pooled effect of hand  
164 hygiene only, hand hygiene combined with face masks, and hand hygiene with or  
165 without face masks was estimated. Results from our meta-analysis on RCTs did not  
166 provide evidence to support a protective effect of hand hygiene only against  
167 transmission of laboratory-confirmed influenza (RR: 1.07; 95% CI: 0.85-1.35; p-  
168 value: 0.58;  $I^2 = 48\%$ ). Although the pooled analysis did not identify a significant  
169 effect of hand hygiene on laboratory-confirmed influenza overall, some household  
170 transmission studies reported that initiating hand hygiene intervention earlier after  
171 symptom onset in the index case might be more effective in preventing secondary  
172 cases in the household settings [11, 13].

173

174 In our systematic review, we identified seven RCTs that reported estimates of the  
175 effectiveness of face masks in reducing laboratory-confirmed influenza virus  
176 infections in household settings (Table S4) [11, 13]. Five of these trials investigated  
177 the masking of all household members, regardless of symptom presentation, and we  
178 were therefore unable to distinguish the potential effects of face masks worn by  
179 infected vs uninfected individuals [11, 13]. Despite results not being statistically  
180 significant, a trial on face masks reported a lower risk of ILI and laboratory-confirmed  
181 influenza infection among those with medical mask use, and similar results were  
182 reported in an earlier study. In the pooled analysis, there was no statistically  
183 significant reduction in influenza transmission with the use of face masks only (RR:  
184 0.59; 95% CI: 0.32-1.10; p-value 0.10;  $I^2 = 16\%$ ) (Figure 2). Study designs in the  
185 seven household studies were slightly different: one trial provided face masks and P2  
186 respirators for household members only, another trial evaluated the use of face masks  
187 as source control for infected individuals only, and the remaining five trials provided  
188 face masks for the infected individuals as well as their household members (Table S4)  
189 [11, 13]. Only two household studies reported a statistically significant reduction in  
190 secondary laboratory-confirmed influenza virus infections, when face masks were  
191 worn within 36 hours of symptom onset [11, 13]. Most household studies were  
192 underpowered due to small sample sizes, and some studies reported suboptimal  
193 adherence in the face mask group.

194

195 We did not identify any published intervention studies on the effectiveness of  
196 respiratory etiquette and face shields in reducing the risk of laboratory-confirmed  
197 influenza in household settings.

198



199 **Environmental measures: surface and object cleaning, ventilation,**  
200 **humidification**

201 We did not identify any published intervention studies that quantified the  
202 effectiveness of modifying humidity, surface and object cleaning, or ventilation in  
203 reducing influenza transmission in household settings.

204

205 **Isolation of sick individuals and physical distancing**

206 We did not identify any published intervention studies on the effectiveness of  
207 isolation policies for sick individuals and physical distancing measures in reducing  
208 the risk of laboratory-confirmed influenza in household settings.

209

210 **DISCUSSION**

211 Prevention and control of respiratory virus infections in households is an important  
212 yet relatively underexplored area of research. Guidelines for infection prevention and  
213 control of seasonal and pandemic influenza in healthcare settings are well established  
214 [14]. During the COVID-19 pandemic, several guidelines on infection control and  
215 prevention in households using NPIs were issued by health authorities alongside  
216 guidance for self-care and family care. For example, the World Health Organization  
217 Q&A webpage on “Home care for families and caregivers” recommends donning  
218 medical masks while sharing a space with someone with COVID-19, staying at least 1  
219 meter away from the sick person, and opening windows to bring fresh air into the sick  
220 person’s room where possible [15]. Although the feasibility of these measures may  
221 depend on living conditions, forward planning for the possibility of having a  
222 household member who is sick with an infectious disease is prudent even in inter-  
223 pandemic periods [16].

224

225 Among household settings, hand hygiene, face masks, respiratory etiquette, surface  
226 and object cleaning and ventilation are feasible NPIs to implement during an  
227 influenza epidemic or pandemic. With hand hygiene and face masks as recommended  
228 hygiene practices to limit the spread of respiratory virus infections within the  
229 household, the effectiveness of such measures could be enhanced through public  
230 health campaigns that boost compliance [17]. Similarly, respiratory etiquette should  
231 be highly feasible in household settings, and an improvement in compliance has been  
232 demonstrated among school children after piloting an educational intervention in one  
233 study in elementary schools [18]. It should also be feasible to implement surface and  
234 object cleaning in the household due to the low cost of implementation and  
235 accessibility of common household cleaning agents. Given the potential for aerosol  
236 transmission of respiratory viruses including influenza [19], improving ventilation  
237 should be considered except perhaps for households in areas with poor outdoor air  
238 quality or when this would substantially increase heating costs. When household  
239 members are sick, it should often be feasible to isolate those sick individuals and  
240 increase physical distancing, for example by avoiding spending time in the same  
241 rooms or eating separately with them [20], although it may be more challenging in  
242 households with crowded living conditions.

243

244 In this review, we did not find evidence to support a substantial protective effect of  
245 personal protective measures, environmental measures, isolation of sick individuals or  
246 physical distancing measures in reducing influenza transmission in household settings.  
247 Although these measures have mechanistic plausibility of reducing influenza  
248 transmission based on our knowledge of how influenza is transmitted between

249 individuals [21, 22], randomized trials of hand hygiene and face masks in household  
250 settings have not demonstrated protection against laboratory-confirmed influenza.  
251 There were no RCTs on respiratory etiquette, face shields, modifying humidity,  
252 ventilation, isolation policies for sick individuals and physical distancing in household  
253 settings.

254

255 Despite a lack of intervention studies on measures other than face masks and hand  
256 hygiene, we identified an observational study on the association between indoor  
257 humidity and influenza transmission, suggesting a potential role of humidification in  
258 controlling transmission of influenza [23] although there are also potential harms of  
259 humidification which would need to be considered, such as increasing mold. Other  
260 studies suggested that surface and object cleaning using common household agents,  
261 indoor ventilation and voluntary self-isolation were effective measures in reducing  
262 influenza transmission by inactivating influenza viruses in the environment or  
263 decreasing the transmission risk [24]. Another retrospective cohort study found that  
264 daily use of chlorine or ethanol-based disinfectant was effective (OR: 0.23, 95% CI:  
265 0.07, 0.84) in reducing COVID-19 household transmission, and similarly for face  
266 mask use (OR: 0.21; 95% CI: 0.06, 0.79) and surface disinfection when the measures  
267 were implemented before symptom onset of the primary case [20]. The disinfection of  
268 surfaces also has an established impact on prevention of other infectious diseases such  
269 as gastrointestinal diseases [25].

270

271 When devising strategies to reduce influenza transmission in households, it is  
272 important to understand the basic transmission dynamics of influenza virus infections.  
273 In the next pandemic, important information on transmission dynamics of the novel

274 strain could be provided by timely First Few Hundred studies [26] and household  
275 transmission studies [27]. If the transmission dynamics of the new pandemic strain are  
276 similar to that of H1N1pdm09 and current interpandemic strains, we can note the  
277 following four properties. First, infectiousness is thought to peak at around the same  
278 time as when symptoms appear [28]. Second, infectiousness likely declines rapidly  
279 within a few days after peak based on viral culture data [29] despite viral RNA  
280 continuing to be detectable by PCR typically for more than a week [30]. Third, only a  
281 fraction of influenza virus infections result in fever, and while fever and cough may  
282 be a relatively more specific syndrome for influenza, it is not particularly sensitive in  
283 the general community as contrasted with its higher sensitivity in individuals who  
284 seek medical attention with respiratory symptoms [31]. Fourth, the role of  
285 asymptomatic and pre-symptomatic transmission has been controversial but recent  
286 reports from South Africa [32] and Hong Kong [33] indicate that these may comprise  
287 a substantial fraction of all influenza transmission, with asymptomatic and pre-  
288 symptomatic transmission also playing an important role in COVID-19 transmission  
289 [34]. This fundamental knowledge of infectiousness profiles would imply that early  
290 intervention is essential to reduce transmission, and early intervention should not be  
291 limited to individuals with a fever and cough but could be triggered by other less  
292 specific symptoms. Rapid antigen tests done in the household could help to  
293 distinguish influenza from other viral infections and might even be considered for use  
294 in exposed individuals to identify influenza virus infection before any symptoms  
295 appear.

296

297 There are a number of limitations to our review. First, in our analysis of the  
298 effectiveness of face masks and hand hygiene we did not review observational data as

299 a higher level of evidence from randomized controlled trials were available. Other  
300 studies have reviewed observational data and concluded that these two measures  
301 likely have small to moderate effects on transmission [35]. Second, we focused on  
302 measures to prevent the spread of influenza within the household in this review. There  
303 is limited evidence on the degree of reductions in transmission in households when  
304 personal protective measures (e.g., wearing face masks plus frequent hand hygiene)  
305 are used in combination with other measures like isolation of sick household members.  
306 The effectiveness of different cleaning products at different concentrations in  
307 deactivating or eliminating influenza virus in household environments remains  
308 unclear. Third, increased influenza activity is associated with cold temperatures, low  
309 indoor humidity and rainy seasons [36]. Further investigation could clarify the  
310 effectiveness of NPIs by different seasonal patterns (such as indoor crowding during  
311 colder months). Finally, we observed low to moderate levels of heterogeneity in our  
312 meta-analyses of hand hygiene and face masks (Figures 1-2). We could determine  
313 whether these differences were artefactual or real, perhaps related to differences in the  
314 adherence of measures in various populations or the time delay between symptom  
315 onset of an infected case and the implementation of a measure [37]. Further work  
316 could attempt to identify additional factors that explain this heterogeneity, for  
317 example, by exploring very different estimates of effectiveness of measures based on  
318 the same population during similar time periods, or conducting subgroup analyses by  
319 the time delay between symptom onset and measure implementation.

320

321 Improved evidence is needed on all of the measures included in our review. Given the  
322 effect sizes in our meta-analysis of hand hygiene and face masks (Figures 1 and 2),  
323 any future RCTs of these interventions in households would likely need to be very

324 large to be adequately powered to detect a relative reduction in the risk of infection of  
325 approximately 10% [38]. To avoid contamination of interventions, cluster randomized  
326 trials, in which each household is randomized to receive either the intervention or  
327 control, could be used to assess the effect of the intervention in reducing the  
328 transmission of influenza in households [11]. A promising area for randomized trials  
329 or cluster-randomized trials in the household setting is the effect of physical  
330 distancing on influenza transmission, either by alternating within-home isolation  
331 strategies or comparing the feasibility and effectiveness of physical distancing in  
332 housing areas with different population densities. Surveys about the feasibility of each  
333 measure in local contexts are also important to inform national-level  
334 recommendations on home care and/or voluntary self-isolation or quarantine [39].

335

336 In conclusion, although our study found limited evidence to support a substantial  
337 protective effect of personal protective measures, environmental measures, isolation  
338 of sick persons or physical distancing measures in controlling influenza transmission  
339 in the household setting, these measures have mechanistic plausibility based on our  
340 knowledge of person-to-person transmission of influenza [21, 22]. Future  
341 investigations on transmission dynamics of influenza would be helpful in preparing  
342 guidelines and evidence-based recommendations for household transmission in the  
343 next pandemic. Although our review focused on NPIs to be used during influenza  
344 pandemics, these results could also be applicable to intense seasonal influenza  
345 epidemics.

346

347

348 **ACKNOWLEDGMENTS**

349 The authors thank Julie Au for administrative support.

350

351 **DATA SHARING STATEMENT**

352 The data that support the findings of this study are available upon request.

353

354 **FUNDING SOURCES**

355 This project was supported by a grant from the World Health Organization and the

356 Strategic Topic Grants Scheme (Project No. STG4/M-701/23-N) of the Research

357 Grants Council of the Hong Kong Special Administrative Region, China.

358

359 **POTENTIAL CONFLICTS OF INTEREST**

360 B.J.C. has consulted for AstraZeneca, Fosun Pharma, GlaxoSmithKline, Haleon,

361 Moderna, Novavax, Pfizer, Roche, and Sanofi Pasteur. All other authors report no

362 potential conflicts of interest.

363

364 **CONTRIBUTIONS**

365 All authors meet the ICMJE criteria for authorship. The study was conceived by BJC,

366 and JYW. JYW and JKC analyzed the data. JYW wrote the first draft of the

367 manuscript. All authors provided critical review and revision of the text and approved

368 the final version.

369

370

371 **REFERENCES**

- 372 [1] Lai S, Ruktanonchai NW, Zhou L, Prosper O, Luo W, Floyd JR, et al. Effect  
373 of non-pharmaceutical interventions to contain COVID-19 in China. *Nature*.  
374 2020;585(7825):410-3.
- 375 [2] Hayden FG, Belshe R, Villanueva C, Lanno R, Hughes C, Small I, et al.  
376 Management of influenza in households: a prospective, randomized comparison of  
377 oseltamivir treatment with or without postexposure prophylaxis. *J Infect Dis*.  
378 2004;189(3):440-9.
- 379 [3] Ghani A, Baguelin M, Griffin J, Flasche S, van Hoek AJ, Cauchemez S, et al.  
380 The Early Transmission Dynamics of H1N1pdm Influenza in the United Kingdom.  
381 *PLoS Curr*. 2009;1:RRN1130.
- 382 [4] The Organisation for Economic Co-operation and Development. Household  
383 definitions in other statistical standards [Available from: [https://www.oecd-](https://www.oecd-ilibrary.org/docserver/9789264194878-18-en.pdf?expires=1721030289&id=id&accname=guest&checksum=A47802DDF2046D9A7DBC0F2529D80432)  
384 [ilibrary.org/docserver/9789264194878-18-](https://www.oecd-ilibrary.org/docserver/9789264194878-18-en.pdf?expires=1721030289&id=id&accname=guest&checksum=A47802DDF2046D9A7DBC0F2529D80432)  
385 [en.pdf?expires=1721030289&id=id&accname=guest&checksum=A47802DDF2046D](https://www.oecd-ilibrary.org/docserver/9789264194878-18-en.pdf?expires=1721030289&id=id&accname=guest&checksum=A47802DDF2046D9A7DBC0F2529D80432)  
386 [9A7DBC0F2529D80432](https://www.oecd-ilibrary.org/docserver/9789264194878-18-en.pdf?expires=1721030289&id=id&accname=guest&checksum=A47802DDF2046D9A7DBC0F2529D80432)]. (Accessed 16 July 2024).
- 387 [5] Ministry of Health. Influenza [Available from:  
388 <https://www.moh.gov.sg/diseases-updates/influenza>]. (Accessed 26 January 2024).
- 389 [6] Nigeria Centre for Disease Control and Prevention. Nigeria National  
390 Pandemic Influenza Preparedness and Response Plan [Available from:  
391 [https://ncdc.gov.ng/themes/common/docs/protocols/16\\_1490369515.pdf](https://ncdc.gov.ng/themes/common/docs/protocols/16_1490369515.pdf)]. (Accessed  
392 28 January 2024).
- 393 [7] Communicable Diseases Network Australia. Seasonal Influenza Infection  
394 CDNA National Guidelines for Public Health Units [Available from:



- 395 [https://www.health.gov.au/sites/default/files/documents/2022/06/influenza-infection-  
396 flu-cdna-national-guidelines-for-public-health-units.pdf](https://www.health.gov.au/sites/default/files/documents/2022/06/influenza-infection-<br/>396 flu-cdna-national-guidelines-for-public-health-units.pdf)]. (Accessed 5 April 2024).
- 397 [8] Ghana Food and Drugs Authority. Frequently Asked Questions on the H1N1  
398 Influenza Virus [Available from:  
399 <https://www.fdaghana.gov.gh/img/reports/H1N1%20FAQs.pdf>]. (Accessed 5 April  
400 2024).
- 401 [9] Public Health Agency of Canada. Flu (influenza): Prevention and risks  
402 [Available from: [https://www.canada.ca/en/public-health/services/diseases/flu-  
403 influenza/prevention-risks.html](https://www.canada.ca/en/public-health/services/diseases/flu-<br/>403 influenza/prevention-risks.html)]. (Accessed 26 January 2024).
- 404 [10] Centers for Disease Control and Prevention. Preventive Actions to Help  
405 Protect Against Flu [Available from: [https://www.cdc.gov/flu/prevent/actions-  
406 prevent-flu.htm](https://www.cdc.gov/flu/prevent/actions-<br/>406 prevent-flu.htm)]. (Accessed 5 April 2024).
- 407 [11] Cowling BJ, Chan KH, Fang VJ, Cheng CK, Fung RO, Wai W, et al.  
408 Facemasks and hand hygiene to prevent influenza transmission in households: a  
409 cluster randomized trial. *Ann Intern Med.* 2009;151(7):437-46.
- 410 [12] Levy JW, Suntarattiwong P, Simmerman JM, Jarman RG, Johnson K, Olsen  
411 SJ, et al. Increased hand washing reduces influenza virus surface contamination in B  
412 angkok households, 2009–2010. *Influenza Other Respir Viruses.* 2014;8(1):13–6.
- 413 [13] Suess T, Remschmidt C, Schink SB, Schweiger B, Nitsche A, Schroeder K, et  
414 al. The role of facemasks and hand hygiene in the prevention of influenza  
415 transmission in households: results from a cluster randomised trial; Berlin, Germany,  
416 2009-2011. *BMC Infect Dis.* 2012;12:26.
- 417 [14] Centers for Disease Control and Prevention. Prevention Strategies for  
418 Seasonal Influenza in Healthcare Settings [Available from:

- 419 <https://www.cdc.gov/flu/professionals/infectioncontrol/healthcaresettings.htm>].
- 420 (Accessed 25 January 2024).
- 421 [15] World Health Organization. Coronavirus disease (COVID-19): Home care for
- 422 families and caregivers [Available from: [https://www.who.int/news-room/questions-](https://www.who.int/news-room/questions-and-answers/item/coronavirus-disease-covid-19-home-care-for-families-and-caregivers)
- 423 [and-answers/item/coronavirus-disease-covid-19-home-care-for-families-and-](https://www.who.int/news-room/questions-and-answers/item/coronavirus-disease-covid-19-home-care-for-families-and-caregivers)
- 424 [caregivers](https://www.who.int/news-room/questions-and-answers/item/coronavirus-disease-covid-19-home-care-for-families-and-caregivers)]. (Accessed 25 January 2024).
- 425 [16] Geddes L. COVID-19 in the house: How to reduce the risk of transmission
- 426 [Available from: [https://www.gavi.org/vaccineswork/covid-19-house-how-reduce-](https://www.gavi.org/vaccineswork/covid-19-house-how-reduce-risk-transmission?gclid=EAIaIQobChMIzdmHvsOfgwMV_thMAh1WsQ2oEAMYASAAEgJT7PD_BwE)
- 427 [risk-](https://www.gavi.org/vaccineswork/covid-19-house-how-reduce-risk-transmission?gclid=EAIaIQobChMIzdmHvsOfgwMV_thMAh1WsQ2oEAMYASAAEgJT7PD_BwE)
- 428 [transmission?gclid=EAIaIQobChMIzdmHvsOfgwMV\\_thMAh1WsQ2oEAMYASAA](https://www.gavi.org/vaccineswork/covid-19-house-how-reduce-risk-transmission?gclid=EAIaIQobChMIzdmHvsOfgwMV_thMAh1WsQ2oEAMYASAAEgJT7PD_BwE)
- 429 [EgJT7PD\\_BwE](https://www.gavi.org/vaccineswork/covid-19-house-how-reduce-risk-transmission?gclid=EAIaIQobChMIzdmHvsOfgwMV_thMAh1WsQ2oEAMYASAAEgJT7PD_BwE)]. (Accessed 25 January 2024).
- 430 [17] Islam M, Benjamin-Chung J, Sultana S, Unicomb L, Alam M, Rahman M, et
- 431 al. Effectiveness of Mass Media Campaigns to Improve Handwashing-Related
- 432 Behavior, Knowledge, and Practices in Rural Bangladesh. *Am J Trop Med Hyg.*
- 433 2021;104(4):1546-53.
- 434 [18] Sultana F, Nizame FA, Southern DL, Unicomb L, Winch PJ, Luby SP. Pilot of
- 435 an Elementary School Cough Etiquette Intervention: Acceptability, Feasibility, and
- 436 Potential for Sustainability. *Am J Trop Med Hyg.* 2017;97(6):1876-85.
- 437 [19] Tellier R, Li Y, Cowling BJ, Tang JW. Recognition of aerosol transmission of
- 438 infectious agents: a commentary. *BMC Infect Dis.* 2019;19(1):101.
- 439 [20] Wang Y, Tian H, Zhang L, Zhang M, Guo D, Wu W, et al. Reduction of
- 440 secondary transmission of SARS-CoV-2 in households by face mask use, disinfection
- 441 and social distancing: a cohort study in Beijing, China. *BMJ Glob Health.* 2020;5(5).

- 442 [21] Leung NHL, Chu DKW, Shiu EYC, Chan KH, McDevitt JJ, Hau BJP, et al.  
443 Respiratory virus shedding in exhaled breath and efficacy of face masks. *Nat Med*.  
444 2020;26(5):676-80.
- 445 [22] Grayson ML, Melvani S, Druce J, Barr IG, Ballard SA, Johnson PD, et al.  
446 Efficacy of soap and water and alcohol-based hand-rub preparations against live  
447 H1N1 influenza virus on the hands of human volunteers. *Clin Infect Dis*.  
448 2009;48(3):285-91.
- 449 [23] Petrie JG, Ohmit SE, Cowling BJ, Johnson E, Cross RT, Malosh RE, et al.  
450 Influenza transmission in a cohort of households with children: 2010-2011. *PLoS One*.  
451 2013;8(9):e75339.
- 452 [24] Aganovic A, Bi Y, Cao G, Kurnitski J, Wargocki P. Modeling the impact of  
453 indoor relative humidity on the infection risk of five respiratory airborne viruses. *Sci*  
454 *Rep*. 2022;12(1):11481.
- 455 [25] Sandora TJ, Shih MC, Goldman DA. Reducing absenteeism from  
456 gastrointestinal and respiratory illness in elementary school students: a randomized,  
457 controlled trial of an infection-control intervention. *Pediatrics*. 2008;121(6):e1555-62.
- 458 [26] Marcato AJ, Black AJ, Walker CR, Morris D, Meagher N, Price DJ, et al.  
459 Learnings from the Australian first few X household transmission project for COVID-  
460 19. *Lancet Reg Health West Pac*. 2022;28:100573.
- 461 [27] Tsang TK, Lau LLH, Cauchemez S, Cowling BJ. Household Transmission of  
462 Influenza Virus. *Trends Microbiol*. 2016;24(2):123-33.
- 463 [28] Tsang TK, Cowling BJ, Fang VJ, Chan KH, Ip DK, Leung GM, et al.  
464 Influenza A Virus Shedding and Infectivity in Households. *J Infect Dis*.  
465 2015;212(9):1420-8.

- 466 [29] Ip DKM, Lau LLH, Chan KH, Fang VJ, Leung GM, Peiris MJS, et al. The  
467 Dynamic Relationship Between Clinical Symptomatology and Viral Shedding in  
468 Naturally Acquired Seasonal and Pandemic Influenza Virus Infections. *Clin Infect*  
469 *Dis.* 2016;62(4):431-7.
- 470 [30] Hirose R, Daidoji T, Naito Y, Watanabe Y, Arai Y, Oda T, et al. Long-term  
471 detection of seasonal influenza RNA in faeces and intestine. *Clin Microbiol Infect.*  
472 2016;22(9):813 e1- e7.
- 473 [31] Monto AS, Gravenstein S, Elliott M, Colopy M, Schweinle J. Clinical signs  
474 and symptoms predicting influenza infection. *Arch Intern Med.* 2000;160(21):3243-7.
- 475 [32] Cohen C, Kleynhans J, Moyes J, McMorrow ML, Treurnicht FK, Hellferscee  
476 O, et al. Asymptomatic transmission and high community burden of seasonal  
477 influenza in an urban and a rural community in South Africa, 2017-18 (PHIRST): a  
478 population cohort study. *Lancet Glob Health.* 2021;9(6):e863-e74.
- 479 [33] Tsang TK, Wang C, Fang VJ, Perera R, So HC, Ip DKM, et al. Reconstructing  
480 household transmission dynamics to estimate the infectiousness of asymptomatic  
481 influenza virus infections. *Proc Natl Acad Sci U S A.* 2023;120(33):e2304750120.
- 482 [34] Gao W, Lv J, Pang Y, Li LM. Role of asymptomatic and pre-symptomatic  
483 infections in covid-19 pandemic. *BMJ.* 2021;375:n2342.
- 484 [35] Gozdzielewska L, Kilpatrick C, Reilly J, Stewart S, Butcher J, Kalule A, et al.  
485 The effectiveness of hand hygiene interventions for preventing community  
486 transmission or acquisition of novel coronavirus or influenza infections: a systematic  
487 review. *BMC Public Health.* 2022;22(1):1283.
- 488 [36] Tamerius J, Nelson MI, Zhou SZ, Viboud C, Miller MA, Alonso WJ. Global  
489 influenza seasonality: reconciling patterns across temperate and tropical regions.  
490 *Environ Health Perspect.* 2011;119(4):439-45.

- 491 [37] Trevas S, Manuel K, Malkani R, Hoelscher D. Mask Adherence and Social  
492 Distancing in Houston, TX from January to April 2021. *Int J Environ Res Public*  
493 *Health*. 2023;20(3).
- 494 [38] Cowling BJ, Leung GM. Face masks and COVID-19: don't let perfect be the  
495 enemy of good. *Euro Surveill*. 2020;25(49).
- 496 [39] Ahmed F, Qualls N, Kowalczyk S, Randolph Cunningham S, Zviedrite N,  
497 Uzicanin A. Feasibility, acceptability, and barriers to implementing select non-  
498 pharmaceutical interventions to reduce the transmission of pandemic influenza -  
499 United States, 2019. *Disaster Med Public Health Prep*. 2022;17:e209.
- 500

| Continent     | Country        | Personal protective measures |                       |            |              | Environmental measures      |             |                | Other measures                |                     |
|---------------|----------------|------------------------------|-----------------------|------------|--------------|-----------------------------|-------------|----------------|-------------------------------|---------------------|
|               |                | Hand hygiene                 | Respiratory etiquette | Face masks | Face shields | Surface and object cleaning | Ventilation | Humidification | Isolation of sick individuals | Physical distancing |
| Africa        | Ghana          | ✓                            | ✓                     |            |              |                             |             |                | ✓                             | ✓                   |
|               | Nigeria        | ✓                            | ✓                     |            |              |                             |             |                | ✓                             | ✓                   |
|               | South Africa   | ✓                            | ✓                     | ✓          |              | ✓                           |             |                | ✓                             | ✓                   |
| Asia          | China          | ✓                            | ✓                     | ✓          |              | ✓                           | ✓           |                | ✓                             | ✓                   |
|               | Singapore      | ✓                            | ✓                     |            |              |                             |             |                | ✓                             | ✓                   |
|               | South Korea    | ✓                            | ✓                     | ✓          |              |                             |             |                | ✓                             | ✓                   |
| Europe        | Germany        |                              |                       | ✓          |              |                             | ✓           |                | ✓                             | ✓                   |
|               | Italy          | ✓                            | ✓                     | ✓          |              |                             |             |                | ✓                             | ✓                   |
|               | United Kingdom | ✓                            | ✓                     |            |              |                             |             |                | ✓                             | ✓                   |
| North America | Canada         | ✓                            | ✓                     |            |              | ✓                           |             |                | ✓                             | ✓                   |
|               | United States  | ✓                            | ✓                     | ✓          |              | ✓                           | ✓           |                | ✓                             | ✓                   |
| Oceania       | Australia      | ✓                            | ✓                     |            |              | ✓                           |             |                | ✓                             | ✓                   |
|               | New Zealand    | ✓                            | ✓                     |            |              |                             | ✓           |                | ✓                             | ✓                   |
| South America | Brazil         | ✓                            | ✓                     | ✓          |              |                             |             |                | ✓                             | ✓                   |
|               | Peru           | ✓                            | ✓                     | ✓          |              | ✓                           |             |                | ✓                             | ✓                   |

Table 1: Recommendations of household-related non-pharmaceutical interventions in different countries.

Table 2: Summary of literature searches for systematic review on non-pharmaceutical interventions in household settings for influenza.

| <b>Type of measures</b>     | <b>No. of studies identified</b> | <b>Main findings</b>                                                                                                                                                                                                                                                                                  |
|-----------------------------|----------------------------------|-------------------------------------------------------------------------------------------------------------------------------------------------------------------------------------------------------------------------------------------------------------------------------------------------------|
| Hand hygiene                | 7                                | The evidence from the RCTs suggested that hand hygiene intervention only did not exert substantial effects on influenza household transmission. However, implementing hand hygiene and face mask at early symptom onset of index patients is effective in reducing secondary transmission of viruses. |
| Respiratory etiquette       | 0                                | No study examining the effectiveness of respiratory etiquette on influenza transmission in household settings was found.                                                                                                                                                                              |
| Face masks                  | 7                                | The evidence from the RCTs suggested that wearing face masks had an effect on reducing influenza household transmission when it was implemented before or at early symptom onset of index patients.                                                                                                   |
| Face shields                | 0                                | No study examining the effectiveness of face shields on influenza transmission in household settings was found.                                                                                                                                                                                       |
| Surface and object cleaning | 0                                | No study examining the effectiveness of surface and object cleaning on influenza transmission in household settings was found.                                                                                                                                                                        |
| Ventilation                 | 0                                | No study examining the effectiveness of ventilation on influenza transmission in household settings was found.                                                                                                                                                                                        |
| Humidification              | 0                                | No study examining the effectiveness of humidification on influenza household transmission was found.                                                                                                                                                                                                 |

---

|                               |   |                                                                                                                      |
|-------------------------------|---|----------------------------------------------------------------------------------------------------------------------|
| Isolation of sick individuals | 0 | No study examining the effectiveness of isolation of sick individuals on influenza household transmission was found. |
| Physical distancing           | 0 | No study examining the effectiveness of physical distancing on influenza household transmission was found.           |

---

RCT: randomized controlled trial.



## FIGURE LEGENDS

Figure 1: Meta-analysis of risk ratios for the effect of hand hygiene with or without face mask use on laboratory-confirmed influenza from 6 randomized controlled trials with 5,118 participants. (A) Hand hygiene alone; (B) Hand hygiene and face mask; (C) Hand hygiene with or without face mask. Pooled estimates were not generated if there was high heterogeneity ( $I^2 \geq 75\%$ ). Squares indicate risk ratio for each of the included studies, horizontal line indicates 95% CIs, dashed vertical line indicates pooled estimation of risk ratio, and diamond indicates pooled estimation of risk ratio. Diamond width corresponds to the 95% CI. The study by Levy et al was excluded in the meta-analysis but included in the review as its number of secondary infections are measured in households instead of participants [12].

Figure 2: Meta-analysis of risk ratios for the effect of face mask use with or without hand hygiene on laboratory-confirmed influenza from 7 randomized controlled trials with 4,247 participants. (A) Face mask use alone; (B) Face mask and hygiene; (C) Face mask with or without hand hygiene. Pooled estimates were not generated if there was high heterogeneity ( $I^2 \geq 75\%$ ). Squares indicate risk ratio for each of the included studies, horizontal line indicates 95% CIs, dashed vertical line indicates pooled estimation of risk ratio, and diamond indicates pooled estimation of risk ratio. Diamond width corresponds to the 95% CI.

## Hand hygiene only

| Author (Year)    | Hand hygiene |       | Control |       | Weight | Risk Ratio | 95% C.I.     |
|------------------|--------------|-------|---------|-------|--------|------------|--------------|
|                  | Events       | Total | Events  | Total |        |            |              |
| Cowling (2008)   | 5            | 84    | 12      | 205   | 5.9%   | 1.02       | [0.37; 2.80] |
| Cowling (2009)   | 14           | 257   | 28      | 279   | 22.6%  | 0.54       | [0.29; 1.01] |
| Larson (2010)    | 29           | 946   | 24      | 904   | 20.6%  | 1.15       | [0.68; 1.97] |
| Ram (2015)       | 9            | 96    | 4       | 117   | 3.0%   | 2.74       | [0.87; 8.63] |
| Simmerman (2011) | 66           | 292   | 58      | 302   | 47.9%  | 1.18       | [0.86; 1.61] |

**Fixed effect model**      **1675**                      **1807** **100.0%**                      **1.07** **[0.85; 1.35]**

Heterogeneity:  $I^2 = 48\%$ ,  $\tau^2 = 0.0807$ ,  $p = 0.11$

Test for overall effect:  $z = 0.55$  ( $p = 0.58$ )

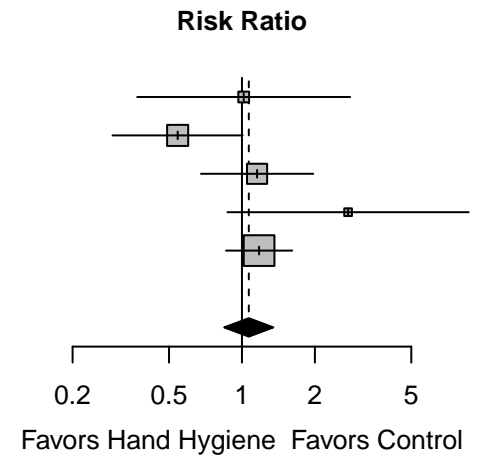

## Hand hygiene with mask

| Author (Year)    | Hand hygiene |       | Control |       | Weight | Risk Ratio | 95% C.I.     |
|------------------|--------------|-------|---------|-------|--------|------------|--------------|
|                  | Events       | Total | Events  | Total |        |            |              |
| Cowling (2009)   | 18           | 258   | 28      | 279   | 21.5%  | 0.70       | [0.39; 1.23] |
| Larson (2010)    | 25           | 938   | 24      | 904   | 19.5%  | 1.00       | [0.58; 1.74] |
| Simmerman (2011) | 66           | 291   | 58      | 302   | 45.4%  | 1.18       | [0.86; 1.62] |
| Suess (2012)     | 10           | 67    | 19      | 82    | 13.6%  | 0.64       | [0.32; 1.29] |

**Fixed effect model**      **1554**                      **1567** **100.0%**                      **0.97** **[0.77; 1.22]**

Heterogeneity:  $I^2 = 28\%$ ,  $\tau^2 = 0.0324$ ,  $p = 0.24$

Test for overall effect:  $z = -0.27$  ( $p = 0.79$ )

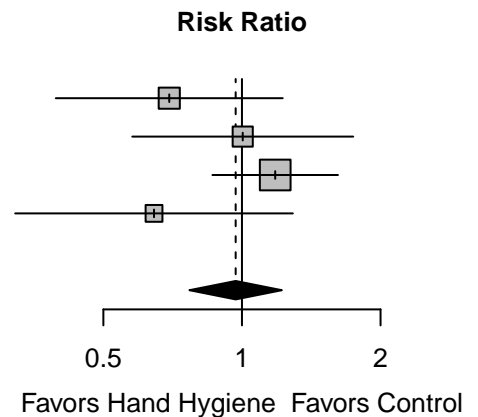

## Hand hygiene with or without mask

| Author (Year)    | Hand hygiene |       | Control |       | Weight | Risk Ratio | 95% C.I.     |
|------------------|--------------|-------|---------|-------|--------|------------|--------------|
|                  | Events       | Total | Events  | Total |        |            |              |
| Cowling (2008)   | 5            | 84    | 12      | 205   | 4.0%   | 1.02       | [0.37; 2.80] |
| Cowling (2009)   | 32           | 515   | 28      | 279   | 21.0%  | 0.62       | [0.38; 1.01] |
| Larson (2010)    | 54           | 1884  | 24      | 904   | 18.8%  | 1.08       | [0.67; 1.73] |
| Ram (2015)       | 9            | 96    | 4       | 117   | 2.1%   | 2.74       | [0.87; 8.63] |
| Simmerman (2011) | 132          | 583   | 58      | 302   | 44.2%  | 1.18       | [0.89; 1.55] |
| Suess (2012)     | 10           | 67    | 19      | 82    | 9.9%   | 0.64       | [0.32; 1.29] |

**Fixed effect model**      **3229**                      **1889** **100.0%**                      **1.02** **[0.84; 1.24]**

Heterogeneity:  $I^2 = 49\%$ ,  $\tau^2 = 0.0616$ ,  $p = 0.08$

Test for overall effect:  $z = 0.16$  ( $p = 0.87$ )

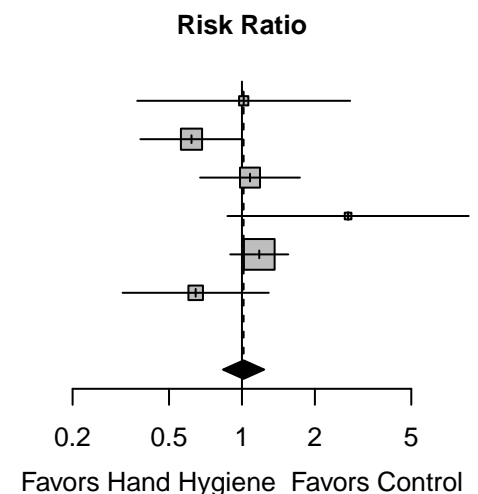

## Mask only

| Author (Year)             | Mask use   |       | Control    |       | Weight        | Risk Ratio  | 95% C.I.            |
|---------------------------|------------|-------|------------|-------|---------------|-------------|---------------------|
|                           | Events     | Total | Events     | Total |               |             |                     |
| Cowling (2008)            | 4          | 61    | 12         | 205   | 22.1%         | 1.12        | [0.37; 3.35]        |
| MacIntyre (2009)          | 1          | 94    | 0          | 100   | 1.9%          | 3.19        | [0.13; 77.36]       |
| MacIntyre (2016)          | 0          | 302   | 1          | 295   | 6.1%          | 0.33        | [0.01; 7.96]        |
| Suess (2012)              | 6          | 69    | 19         | 82    | 69.8%         | 0.38        | [0.16; 0.89]        |
| <b>Fixed effect model</b> | <b>526</b> |       | <b>682</b> |       | <b>100.0%</b> | <b>0.59</b> | <b>[0.32; 1.10]</b> |

Heterogeneity:  $I^2 = 16\%$ ,  $\tau^2 = 0.2375$ ,  $p = 0.31$

Test for overall effect:  $z = -1.66$  ( $p = 0.10$ )

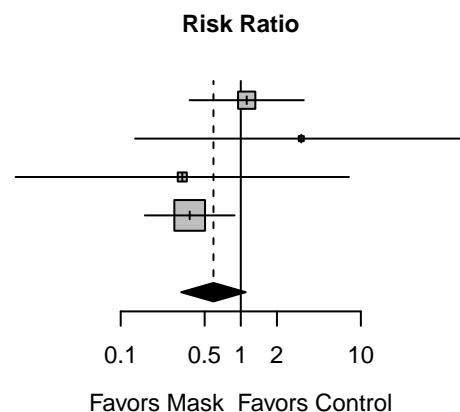

## Mask with hand hygiene

| Author (Year)             | Mask use    |       | Control     |       | Weight        | Risk Ratio  | 95% C.I.            |
|---------------------------|-------------|-------|-------------|-------|---------------|-------------|---------------------|
|                           | Events      | Total | Events      | Total |               |             |                     |
| Cowling (2009)            | 18          | 258   | 28          | 279   | 21.5%         | 0.70        | [0.39; 1.23]        |
| Larson (2010)             | 25          | 938   | 24          | 904   | 19.5%         | 1.00        | [0.58; 1.74]        |
| Simmerman (2011)          | 66          | 291   | 58          | 302   | 45.4%         | 1.18        | [0.86; 1.62]        |
| Suess (2012)              | 10          | 67    | 19          | 82    | 13.6%         | 0.64        | [0.32; 1.29]        |
| <b>Fixed effect model</b> | <b>1554</b> |       | <b>1567</b> |       | <b>100.0%</b> | <b>0.97</b> | <b>[0.77; 1.22]</b> |

Heterogeneity:  $I^2 = 28\%$ ,  $\tau^2 = 0.0324$ ,  $p = 0.24$

Test for overall effect:  $z = -0.27$  ( $p = 0.79$ )

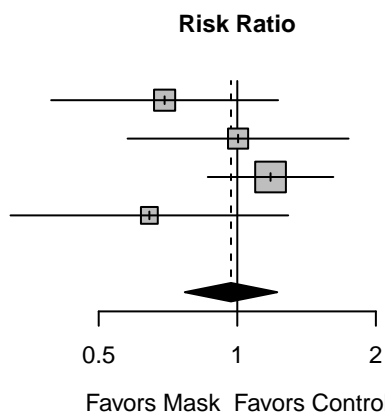

## Mask with or without hand hygiene

| Author (Year)             | Mask use    |       | Control     |       | Weight        | Risk Ratio  | 95% C.I.            |
|---------------------------|-------------|-------|-------------|-------|---------------|-------------|---------------------|
|                           | Events      | Total | Events      | Total |               |             |                     |
| Cowling (2008)            | 4           | 61    | 12          | 205   | 3.9%          | 1.12        | [0.37; 3.35]        |
| Cowling (2009)            | 18          | 258   | 28          | 279   | 19.3%         | 0.70        | [0.39; 1.23]        |
| Larson (2010)             | 25          | 938   | 24          | 904   | 17.5%         | 1.00        | [0.58; 1.74]        |
| MacIntyre (2009)          | 1           | 94    | 0           | 100   | 0.3%          | 3.19        | [0.13; 77.36]       |
| MacIntyre (2016)          | 0           | 302   | 1           | 295   | 1.1%          | 0.33        | [0.01; 7.96]        |
| Simmerman (2011)          | 66          | 291   | 58          | 302   | 40.8%         | 1.18        | [0.86; 1.62]        |
| Suess (2012)              | 16          | 136   | 19          | 82    | 17.0%         | 0.51        | [0.28; 0.93]        |
| <b>Fixed effect model</b> | <b>2080</b> |       | <b>2167</b> |       | <b>100.0%</b> | <b>0.94</b> | <b>[0.75; 1.17]</b> |

Heterogeneity:  $I^2 = 27\%$ ,  $\tau^2 = 0.0640$ ,  $p = 0.22$

Test for overall effect:  $z = -0.58$  ( $p = 0.56$ )

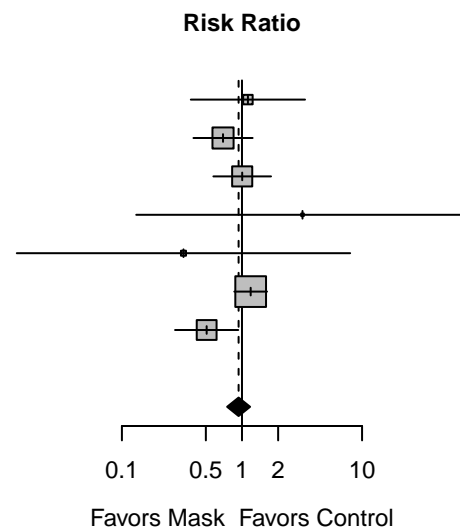

Source: https://medrxiv.org/content/10.1101/2024.09.10.24313390.full.pdf
